# Supplementary material for: Urinary iodine: comparison of a simple method for its determination in microplates with measurement by inductively-coupled plasma mass spectrometry
Source: PubMed Central journal article supplement (PMC5206638; doi:10.1038/srep39835), 2017-01-03
Supplement: srep39835-s1.pdf [file srep39835-s1.pdf]

Urinary iodine: comparison of a simple method for its determination in microplates  
with measurement by inductively-coupled plasma mass spectrometry

Michael Haap<sup>1</sup>, Heinz Jürgen Roth<sup>2</sup>, Thomas Huber<sup>2</sup>, Helmut Dittmann<sup>3</sup> and  
Richard Wahl<sup>1</sup>

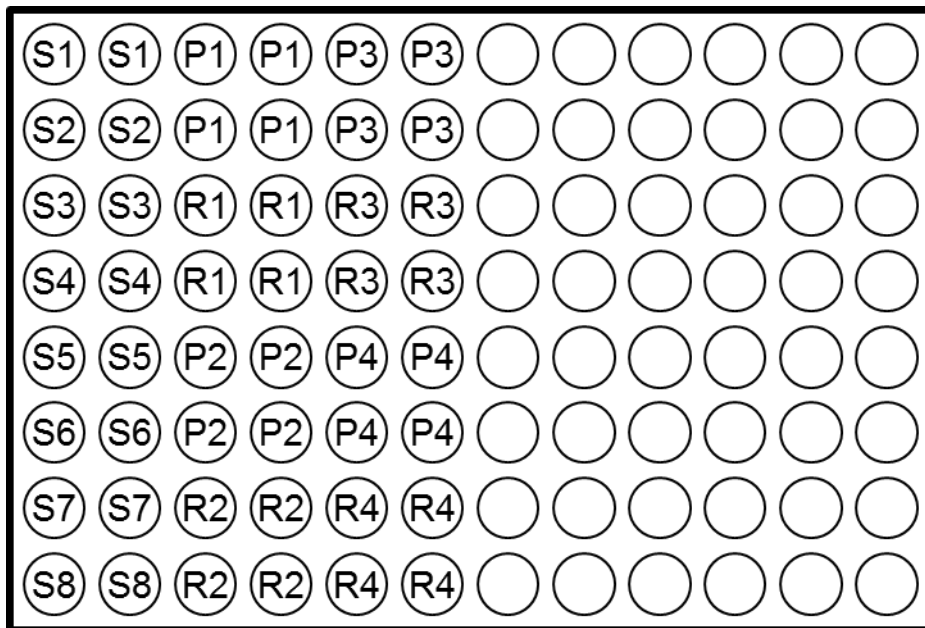

**Supplementary Figure S 1:** Arrangement of samples in the microplate. S1-S8 standards, P patients, R Recovery of iodine in the patient`s samples. The remaining vials can be filled with additional patient samples.
